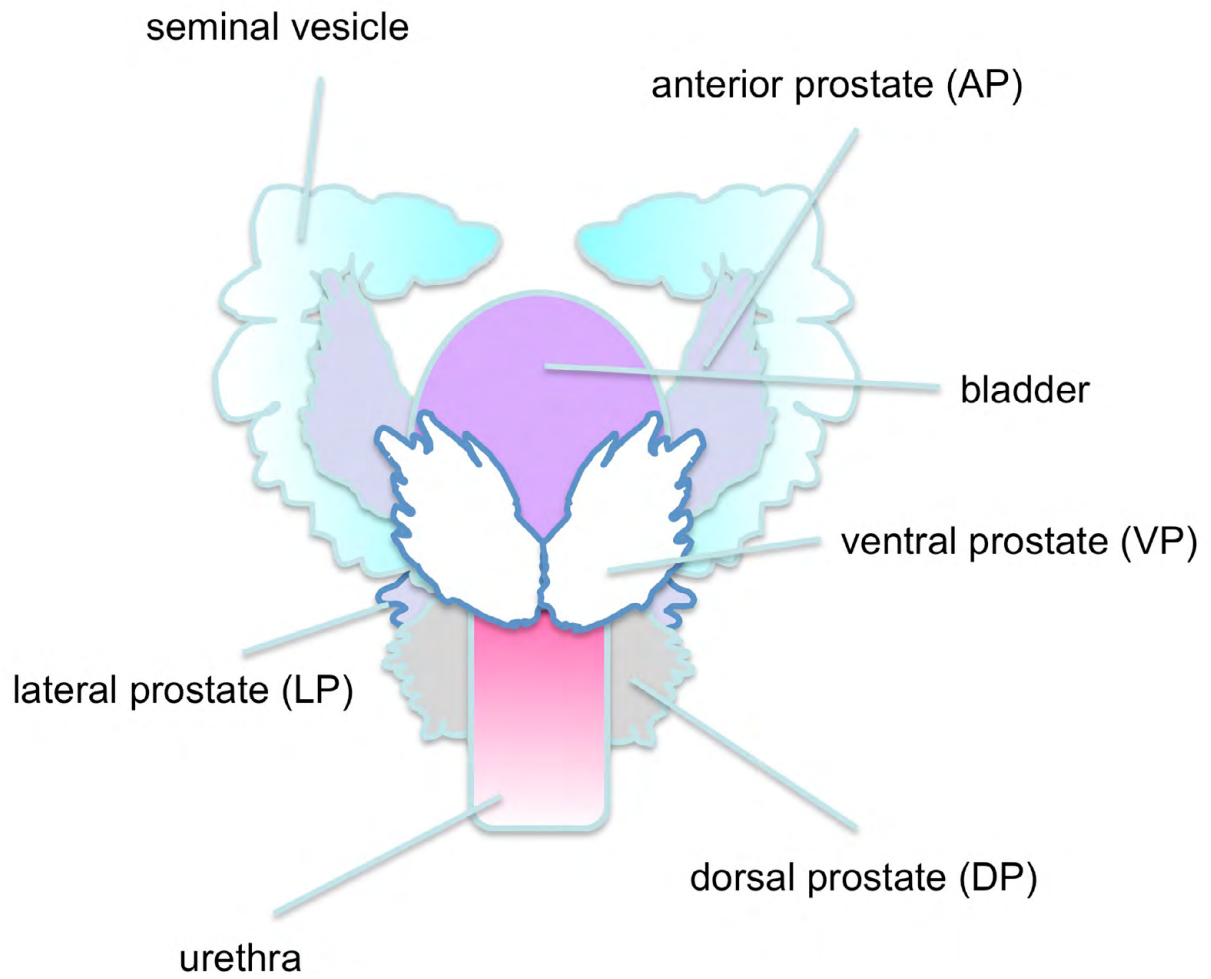

**Fig. S1.** Cartoon depicting the male urogenital system in adult mice indicating the prostatic lobes.

**A**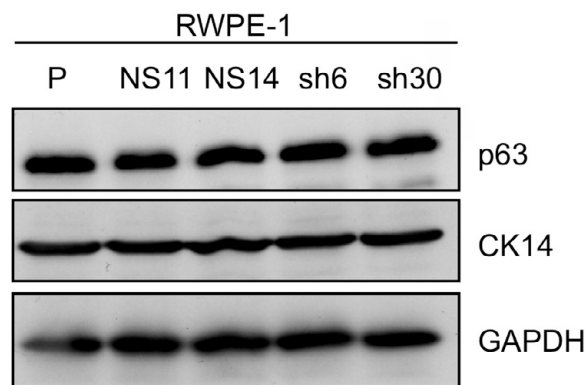**B**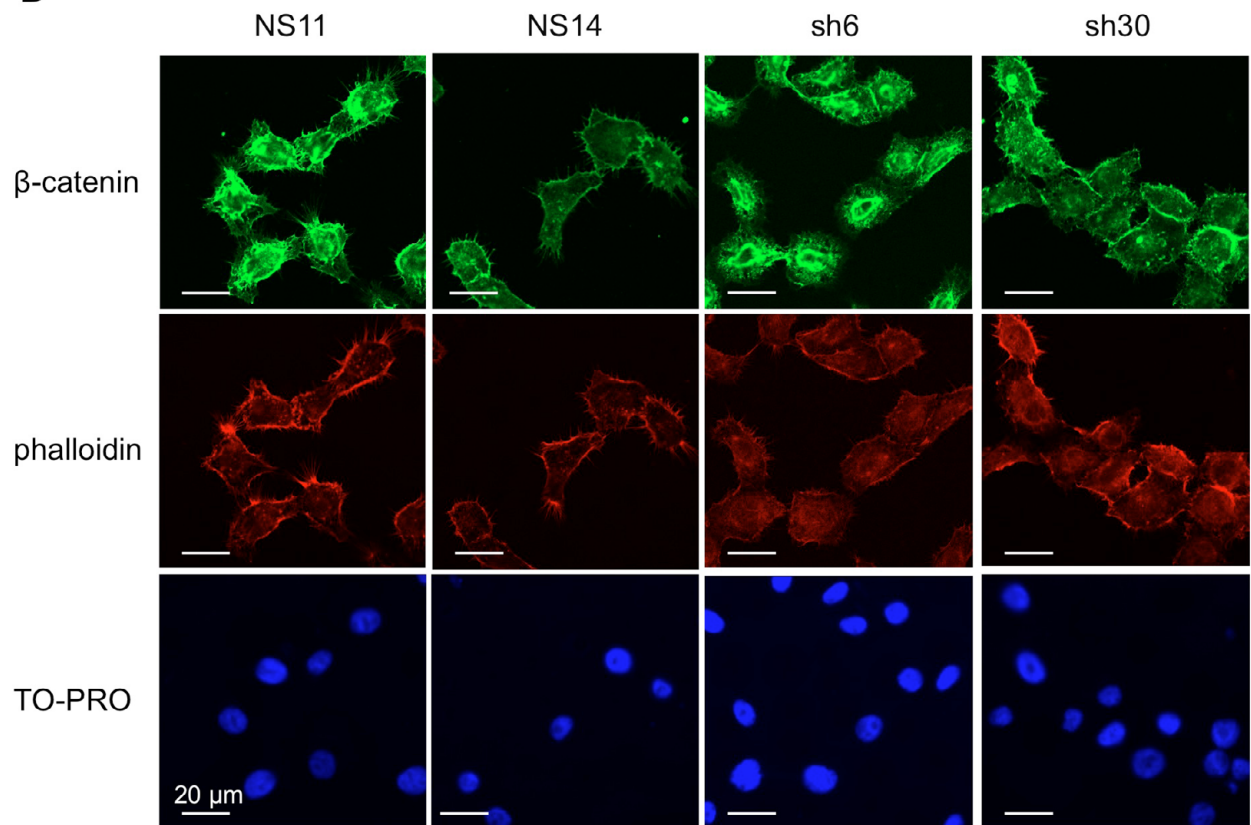

**Fig. S2.** Phenotypic and morphological characterization of Dkk-3-silenced RWPE-1 sublines. (A) Western blot for p63 and CK14 in RWPE-1 parental cells (P), Dkk-3 depleted clones (sh6 and sh30), and non-silenced control clones (NS11 and NS14). GAPDH was used as a loading control. (B) Immunostaining for  $\beta$ -catenin (green) and F-actin (red, detected using fluorescent phalloidin) in the indicated RWPE-1 sublines; nuclei were stained using TO-PRO-3 (blue).

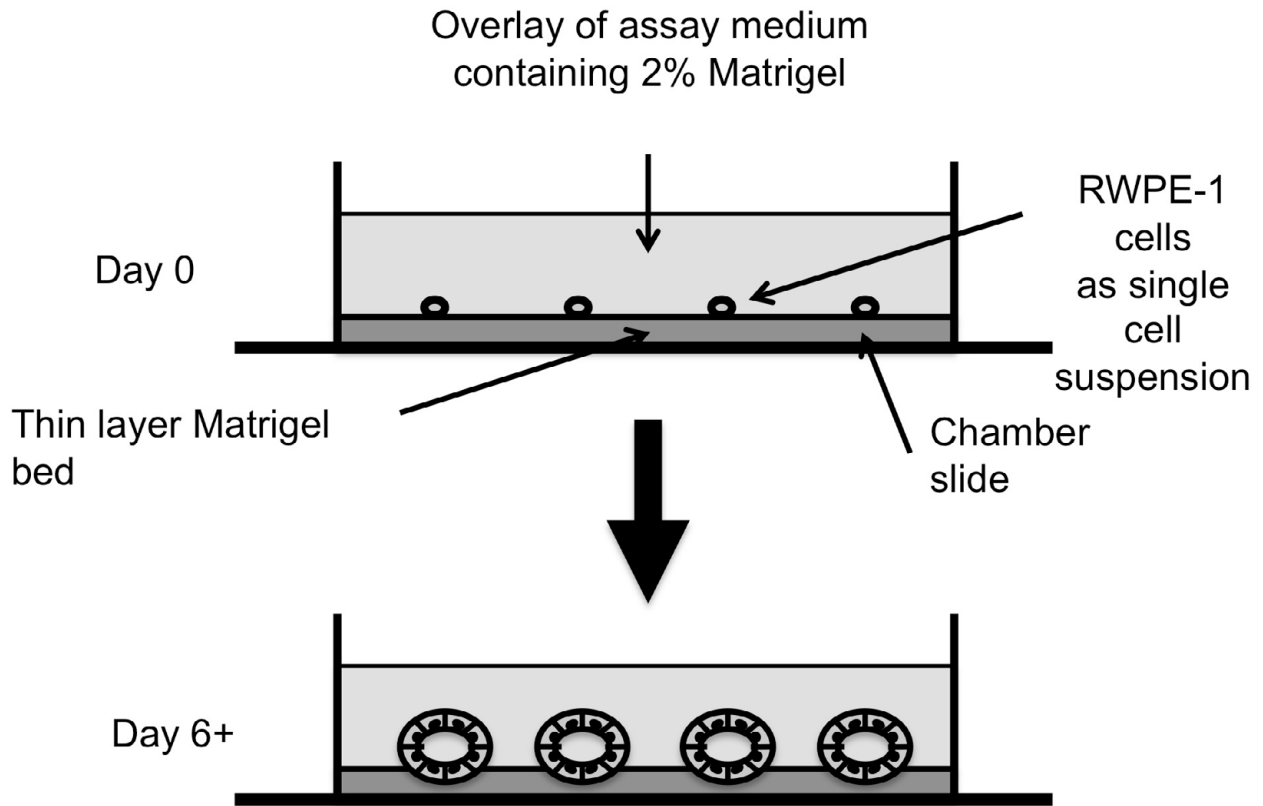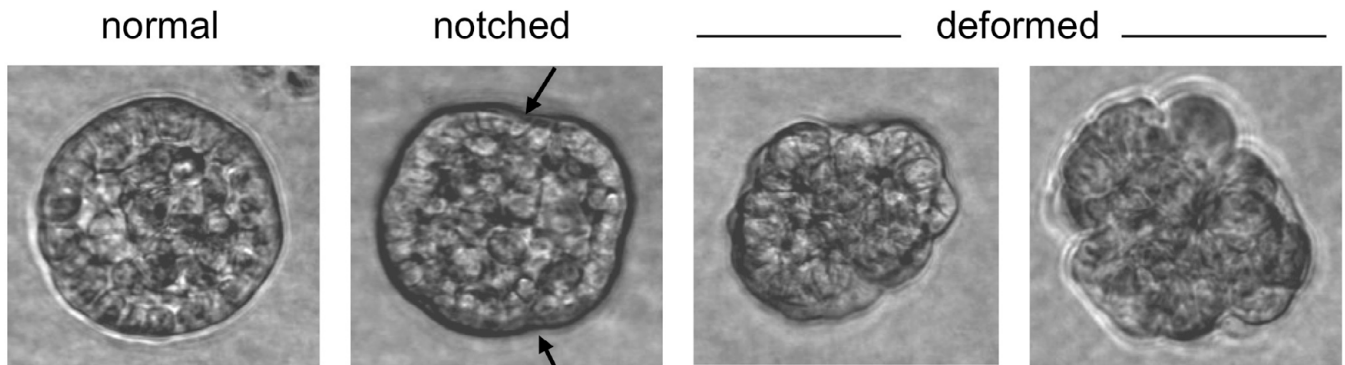

**Fig. S3.** RWPE-1 acinar morphogenesis assays. Top: schematic diagram of the acinar morphogenesis assay of RWPE-1 cells on Matrigel (adapted from Debnath (Debnath et al., 2003)). RWPE-1 cells are seeded as a single-cell suspension in assay medium containing 2% FCS, 5 ng/ml EGF and 2% Matrigel onto a thin layer bed of solidified Matrigel. The assay medium is replaced every the other day and acinar formation usually becomes apparent by day 6. Bottom: Acinar morphogenesis phenotypes observed in RWPE-1 derived sublines. Representative examples of ‘normal’, ‘notched’ (acini with irregular periphery) and ‘deformed’ (amorphous aggregation without trace of acinar structure) are shown.

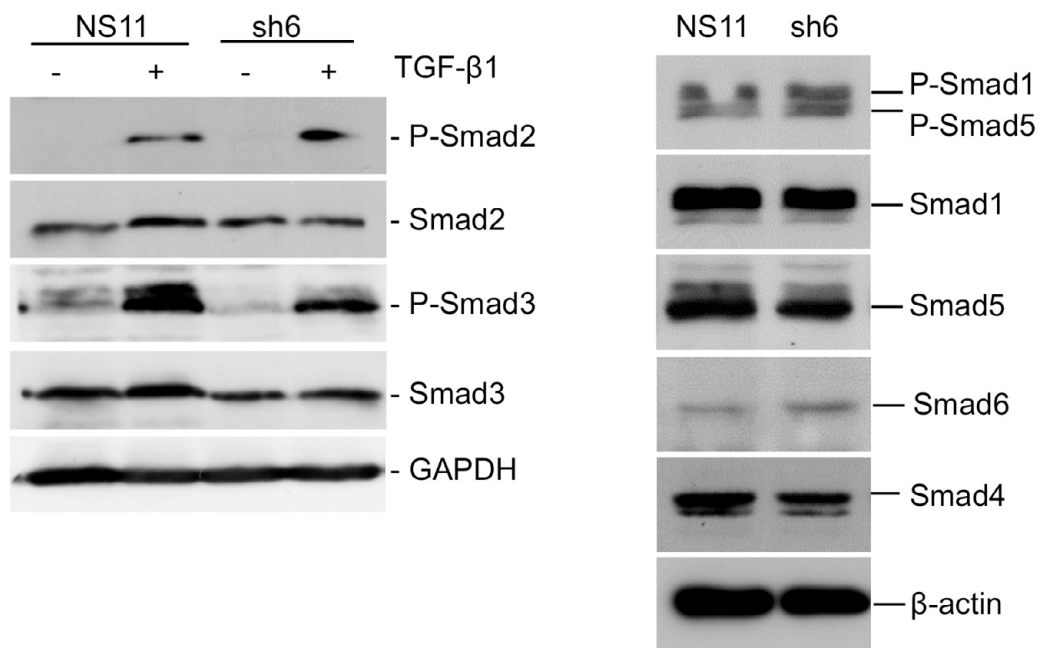

**Fig. S4.** Expression and phosphorylation of Smad proteins in Dkk-3-silenced cells. Extracts from the RWPE-1 NS11 and sh6 cells (left panels treated for 1 h with vehicle (PBS) or 1 ng/ml TGF-β1) were probed by western blotting for the indicated proteins.

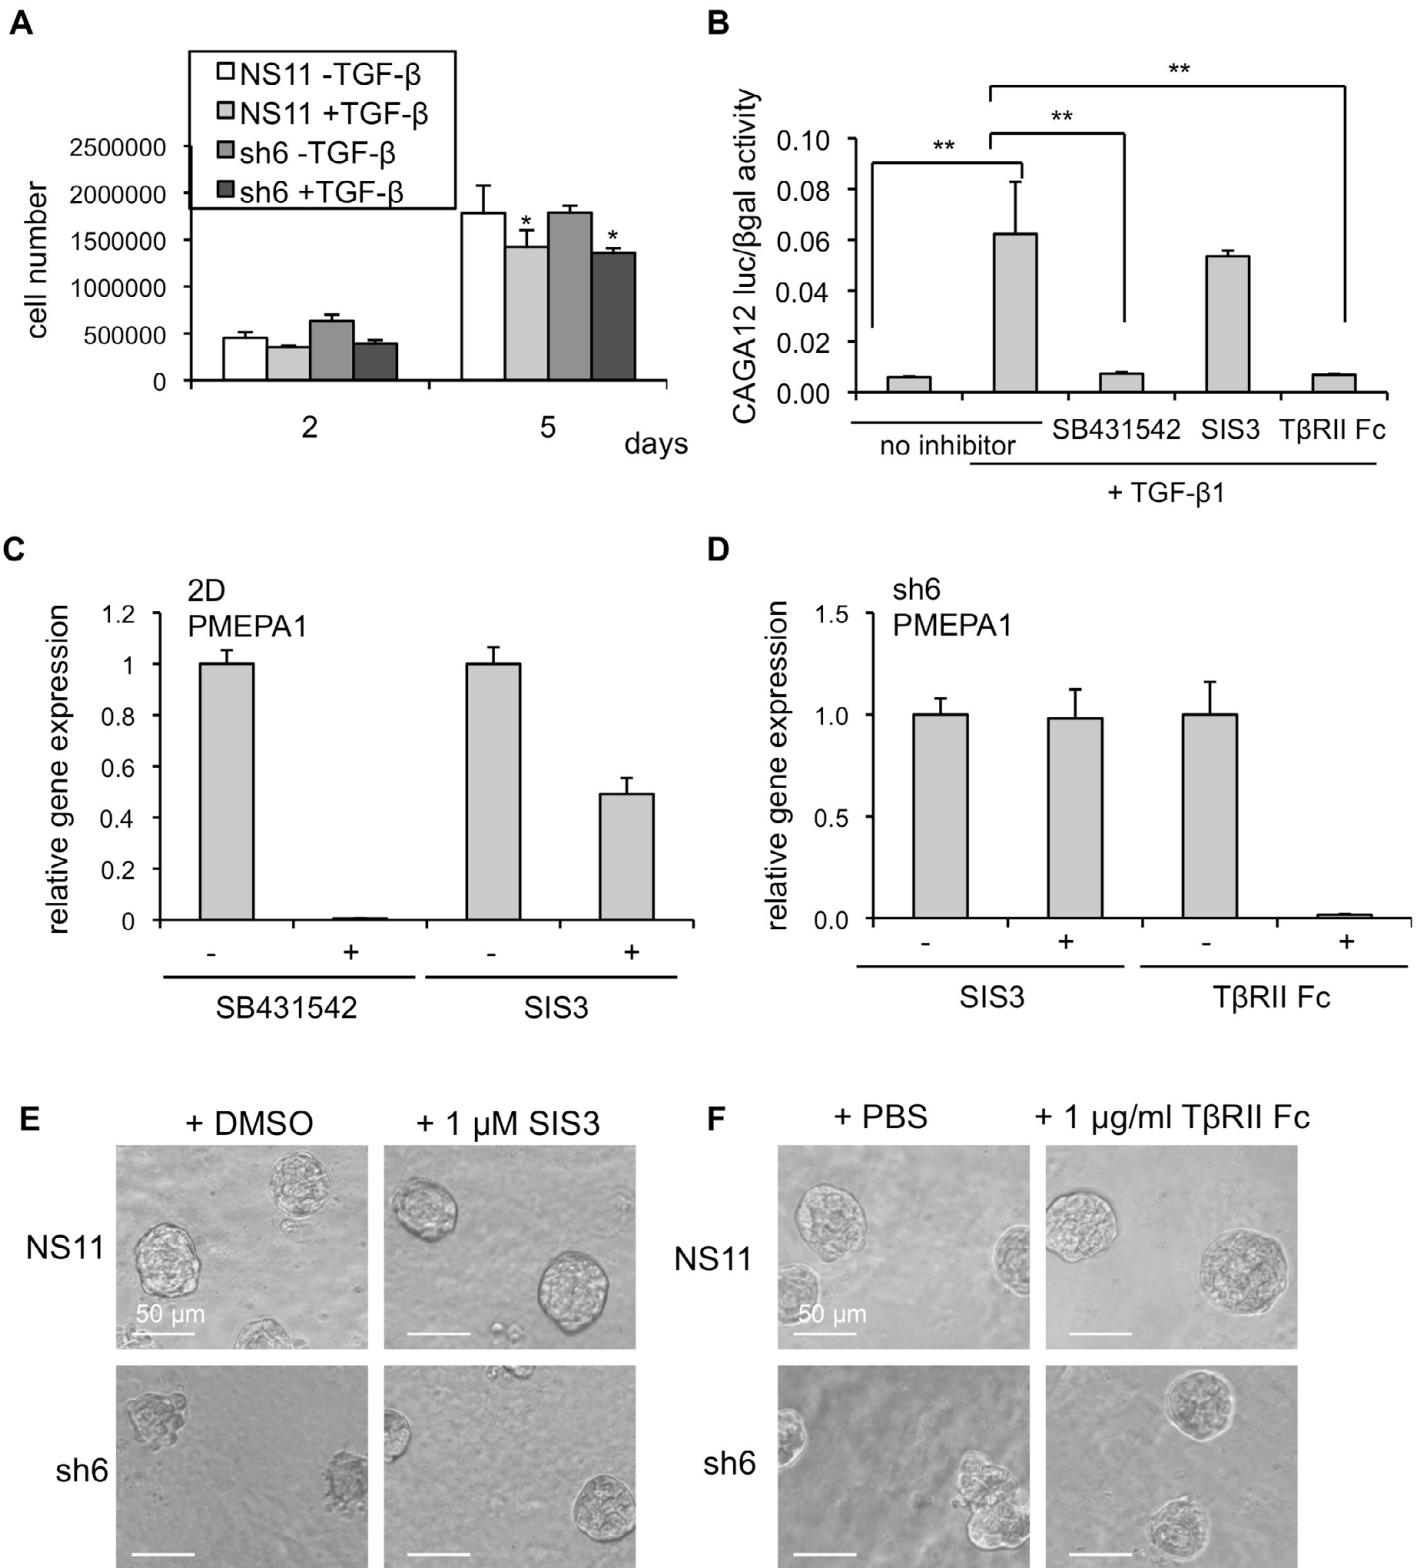

**Fig. S5.** Effects of TGF- $\beta$  and TGF- $\beta$  signalling inhibitors on RWPE-1 cells. **(A)** Cell proliferation assays for RWPE-1 sublines cultured as monolayers.  $2.5 \times 10^5$  cells were plated in triplicate for each time point and cells were counted after 2 and 5 days. The average and s.d. of cell number are shown from a representative experiment ( $n=3$ ). TGF- $\beta$  treatment reduces cell number in sh6 and NS11 cells at 5 days; \* $P < 0.05$  Student's t test,  $P=0.12$  (NS11) and  $0.12$  (sh6) at 2 days. **(B)** Effects of TGF- $\beta$  signalling inhibitors on CAGA-luciferase activity. RWPE-1 sh6 cells transfected with pGL3-CAGA12-luciferase and pDM- $\beta$ -gal, untreated or treated with TGF- $\beta$ 1 (1 ng/ml) and either SB431542 (1  $\mu$ M), SIS3 (1  $\mu$ M), TGF $\beta$ RII-Fc (1  $\mu$ g/ml) or an equivalent volume of vehicle (DMSO or PBS, in the case of TGF $\beta$ RII-Fc) for 21 h were assayed for gene reporter activity; \*\* $P < 0.001$  vs TGF- $\beta$ 1, Student's t test,  $n=3$ . **(C)** Effects of TGF- $\beta$  signalling inhibitors on PMEPA1 expression. Graph shows relative expression of PMEPA1 in RWPE-1 NS11 cells growing as a monolayer (2D), as determined by q-PCR. **(D)** Effects of TGF- $\beta$  signalling inhibitors on PMEPA1 expression. Graph shows relative expression of PMEPA1 in RWPE-1 sh6 cells growing in 3D, as determined by q-PCR. **(E)** Representative images of acini from the experiment shown in Fig. 6D. **(F)** Representative images of acini from the experiment shown in Fig. 6E.
